# Supplementary material for: A Plasmid Carrying blaIMP-56 in Pseudomonas aeruginosa Belonging to a Novel Resistance Plasmid Family
Source: MDPI journal article supplement (doi:10.3390/microorganisms10091863), 2022-09-17
Supplement: s1 [file s1]

**Table S1.** Characteristics of the plasmids included in the phylogenetic tree of the RepA proteins.

| Plasmid name | Strain  | Accession number | Country             | Size (bp) | Resistance genes                                                                                                                                                                                                                               | Replicase | Family                     | Incompatibility group |
|--------------|---------|------------------|---------------------|-----------|------------------------------------------------------------------------------------------------------------------------------------------------------------------------------------------------------------------------------------------------|-----------|----------------------------|-----------------------|
| unnamed1     | AR_0353 | NZ_CP027173.1    | -                   | 41,559    | <i>bla</i> <sub>GES-1</sub>                                                                                                                                                                                                                    | RepA      | <i>PriCT-1</i> superfamily | ND                    |
| unnamed1     | AR_0356 | NZ_CP027168.1    | -                   | 57,053    | <i>bla</i> <sub>KPC-2</sub>                                                                                                                                                                                                                    | RepA      | <i>Rep_3</i> superfamily   | ND                    |
| unnamed2     | AR_0356 | NZ_CP027170.1    | -                   | 438,531   | <i>aadA16</i> , <i>tet</i> (G),<br><i>qacEΔ1</i> , <i>aac</i> (6')-<br><i>Ib4</i>                                                                                                                                                              | RepA      | <i>Rep_3</i> superfamily   | ND                    |
| unnamed3     | AR441   | NZ_CP029094.1    | -                   | 438,529   | <i>aac</i> (6')- <i>Ib4</i> ,<br><i>aadA16</i> , <i>tet</i> (G),<br><i>sul1</i> , <i>qacEΔ1</i>                                                                                                                                                | RepA      | <i>Rep_3</i> superfamily   | ND                    |
| p1           | C79     | NZ_CP040685.1    | China               | 40,180    | <i>bla</i> <sub>KPC-2</sub>                                                                                                                                                                                                                    | RepA      | <i>HTH</i> superfamily     | IncP-6                |
| pF092021-2   | F092021 | NZ_CP081289.1    | China:<br>Henan     | 32,558    | <i>aac</i> (6')- <i>II</i> , <i>bla</i> <sub>IMP-10</sub>                                                                                                                                                                                      | RepA      | <i>Rep_3</i> superfamily   | ND                    |
| unnamed1     | P8W     | CP081478.1       | China:<br>Tianjin   | 232,884   | <i>sul1</i> , <i>cmlA6</i> ,<br><i>qacE</i> , <i>ant</i> (2'')- <i>la</i>                                                                                                                                                                      | RepA      | <i>Rep_3</i> superfamily   | ND                    |
| pOZ176       | PA96    | NC_022344.1      | Guangzhou,<br>China | 500,839   | <i>aac</i> (6')- <i>Ib4</i> ,<br><i>aac</i> (6')- <i>Ib4</i> ,<br><i>aac</i> (6')- <i>Ib4</i> ,<br><i>aph</i> (3')- <i>II</i> , <i>sul1</i> ,<br><i>catB8a</i> , <i>bla</i> <sub>OXA-10</sub> ,<br><i>bla</i> <sub>IMP-9</sub> , <i>qacEΔ1</i> | RepA      | <i>Rep_3</i> superfamily   | IncP-2                |
| pMATVIM-7    | P07-406 | AM778842.1       | USA: Texas          | 24,179    | <i>bla</i> <sub>VIM-7</sub>                                                                                                                                                                                                                    | RepA      | <i>HTH</i> superfamily     | ND                    |
| pNOR-2000    | COL-1   | NC_020452.1      | France              | 21,880    | <i>qacEΔ1</i> , <i>sul1</i> ,<br><i>bla</i> <sub>VIM-2</sub>                                                                                                                                                                                   | RepA      | <i>Rep_3</i> superfamily   | ND                    |

|            |                   |               |                    |         |                                                                                                                                                                                                                                                                              |      |                                    |        |
|------------|-------------------|---------------|--------------------|---------|------------------------------------------------------------------------------------------------------------------------------------------------------------------------------------------------------------------------------------------------------------------------------|------|------------------------------------|--------|
| pCOL-1     | ST308             | NC_022346.1   | Colombia           | 31,529  | <i>bla</i> <sub>KPC-2</sub>                                                                                                                                                                                                                                                  | RepA | <i>HTH</i><br><i>superfamily</i>   | IncP-6 |
| unnamed    | FDAARGOS_570      | CP033834.1    | USA                | 36,032  | <i>aac</i> (6′)- <i>lb</i> 3,<br><i>aph</i> (6)- <i>ld</i> ,<br><i>aph</i> (3′′)- <i>Ib</i> ,<br><i>aac</i> (6′)- <i>lb</i> 3, <i>sul</i> 1,<br><i>bla</i> <sub>OXA-10</sub> , <i>bla</i> <sub>VIM-6</sub> ,<br><i>bla</i> <sub>OXA-10</sub> , <i>qacEΔ</i> 1,<br><i>cmx</i> | RepA | <i>HTH</i><br><i>superfamily</i>   | ND     |
| p10265-KPC | 10265             | NZ_KU578314.1 | China              | 38,939  | <i>bla</i> <sub>TEM</sub> , <i>bla</i> <sub>KPC-2</sub>                                                                                                                                                                                                                      | RepA | <i>HTH</i><br><i>superfamily</i>   | IncP-6 |
| pCB58      | -                 | NZ_KY630469.1 | Porto,<br>Portugal | 32,207  | <i>aac</i> (6′)- <i>lb</i> 4,<br><i>aac</i> (3)- <i>Ia</i> , <i>aac</i> (6′)-<br><i>II</i> , <i>aph</i> (6)- <i>ld</i> ,<br><i>aph</i> (3′′)- <i>Ib</i> ,<br><i>qacEΔ</i> 1, <i>sul</i> 1,<br><i>bla</i> <sub>VIM-2</sub>                                                    | RepA | <i>Rep_3</i><br><i>superfamily</i> | ND     |
| pAMBL2     | PAO1              | NZ_KP873171.1 | Madrid             | 24,133  | <i>aadA</i> 1, <i>aac</i> (6′)-<br><i>lb</i> 4, <i>sul</i> 1, <i>bla</i> <sub>VIM-1</sub> ,<br><i>bla</i> <sub>VIM-1</sub> , <i>bla</i> <sub>VIM-1</sub> ,<br><i>qacEΔ</i> 1                                                                                                 | RepA | <i>Rep_3</i><br><i>superfamily</i> | ND     |
| pJB37      | FFU NA<br>P_PS_37 | NZ_KY494864.1 | Porto,<br>Portugal | 464,804 | <i>aac</i> (6′)- <i>II</i> , <i>aac</i> (3)-<br><i>Ia</i> , <i>aac</i> (6′)- <i>Ib</i> 4,<br><i>qacEΔ</i> 1, <i>sul</i> 1,<br><i>bla</i> <sub>VIM-2</sub>                                                                                                                    | RepA | <i>Rep_3</i><br><i>superfamily</i> | IncP-2 |
| pD5170990  | D5170990          | KX169264.1    | Brazil             | 32,424  | <i>sul</i> 1, <i>aac</i> (6′)- <i>II</i> ,<br><i>aph</i> (3′′)- <i>Ib</i> ,<br><i>aph</i> (6)- <i>ld</i> ,<br><i>qacEΔ</i> 1, <i>cmx</i> ,<br><i>bla</i> <sub>KPC-2</sub>                                                                                                    | RepA | <i>HTH</i><br><i>superfamily</i>   | ND     |

|             |           |               |                    |         |                                                                                                                                                                                              |         |                        |    |
|-------------|-----------|---------------|--------------------|---------|----------------------------------------------------------------------------------------------------------------------------------------------------------------------------------------------|---------|------------------------|----|
| p243931-IMP | 243931    | NZ_MN208062.1 | China;<br>Zhejiang | 392,046 | <i>msr(E), armA,<br/>aph(3')-Ia,<br/>aac(6')-Ib4, ARR-<br/>2, mph(E),<br/>qnrVC1, sul1,<br/>dfrA22, tet(C),<br/>bla<sub>OXA-1</sub>, bla<sub>IMP-45</sub>,<br/>qacEΔ1, catB3</i>             | RepAcin | COG5527<br>superfamily | ND |
| p60503-DIM  | 60503     | NZ_MN208063.1 | China:<br>Beijing  | 407,628 | <i>catB3, qacEΔ1,<br/>aac(6')-IIa,<br/>aac(6')-IIa,<br/>aac(6')-Ib,<br/>aph(3'')-Ib,<br/>aadA1, aph(6)-Id,<br/>qnrVC6, sul1,<br/>dfrA1, dfrB,<br/>bla<sub>OXA-4</sub>, bla<sub>DIM</sub></i> | RepA    | AAA_25<br>ATPase       | ND |
| pJB35       | -         | NZ_MF168945.1 | Portugal           | 31,166  | <i>aac(6')-Ib4,<br/>aac(6')-II,<br/>qacEΔ1, sul1,<br/>bla<sub>VIM-2</sub></i>                                                                                                                | RepA    | Rep_3<br>superfamily   | ND |
| pCOOP-101   | PAcoop101 | NZ_MF141039.1 | United<br>kingdom  | 26,108  | <i>dfrA1, sul1,<br/>aadA22, aac(6')-<br/>II, qacEΔ1, bla<sub>VIM-4</sub></i>                                                                                                                 | RepA    | Rep_3<br>superfamily   | ND |
| pOXA-198    | PA41437   | NZ_MG958650.1 | France             | 48,978  | <i>cmlA1, qacEΔ1,<br/>sul1, bla<sub>OXA-198</sub>,<br/>aac(6')-II</i>                                                                                                                        | RepA    | PriCT-1<br>superfamily | ND |
| pPA2047     | 2047      | NZ_MN082782.1 | Argentina          | 43,660  | <i>bla<sub>KPC-2</sub></i>                                                                                                                                                                   | RepA    | PriCT-1<br>superfamily | ND |

|              |           |               |                    |         |                                                                                                                                                                                                                                                                                |      |                                    |        |
|--------------|-----------|---------------|--------------------|---------|--------------------------------------------------------------------------------------------------------------------------------------------------------------------------------------------------------------------------------------------------------------------------------|------|------------------------------------|--------|
| pTROUS1      | 163940    | NZ_MK047610.1 | France             | 42,035  | <i>aac(6')-Ib</i> ,<br><i>qacEΔ1</i> , <i>sul1</i> ,<br><i>bla</i> <sub>OXA-19</sub> , <i>bla</i> <sub>IMP-63</sub>                                                                                                                                                            | RepA | <i>Rep_3</i><br><i>superfamily</i> | ND     |
| pMRVIM0713   | MRSN17623 | KP975076.1    | USA                | 36,032  | <i>aac(6')-Ib3</i> ,<br><i>aac(6')-Ib3</i> ,<br><i>aph(6)-Id</i> ,<br><i>aph(3'')-Ib</i> , <i>sul1</i> ,<br><i>bla</i> <sub>OXA-10</sub> , <i>bla</i> <sub>VIM-6</sub> ,<br><i>qacEΔ1</i> , <i>cmx</i>                                                                         | RepA | <i>HTH</i><br><i>superfamily</i>   | ND     |
| pNK546b      | NK546     | NZ_MN583270.1 | China:<br>Tianjin  | 232,884 | <i>sul1</i> , <i>qacE</i> ,<br><i>cmlA6</i> , <i>ant(2'')-Ia</i>                                                                                                                                                                                                               | RepA | <i>Rep_3</i><br><i>superfamily</i> | IncP-7 |
| p1160-VIM    | 1160      | NZ_MF144194.1 | China              | 205,426 | <i>msr(E)</i> , <i>aph(3'')-Ib</i> , <i>aph(6)-Id</i> ,<br><i>aac(6')-Ib4</i> ,<br><i>aac(6')-Ib</i> ,<br><i>dfrA42</i> , <i>aadA1</i> ,<br><i>mph(E)</i> , <i>ere(A)</i> ,<br><i>qnrVC6</i> , <i>sul1</i> ,<br><i>bla</i> <sub>VIM-24</sub> , <i>qacEΔ1</i> ,<br><i>catB3</i> | RepA | <i>Rep_3</i><br><i>superfamily</i> | IncP-7 |
| p2           | ZPPH2     | NZ_CP077987.1 | China:<br>Hangzhou | 35,358  | <i>tet(A)</i>                                                                                                                                                                                                                                                                  | RepA | <i>Rep_3</i><br><i>superfamily</i> | ND     |
| p4           | ZPPH1     | NZ_CP077992.1 | China:<br>Hangzhou | 35,358  | <i>tet(A)</i>                                                                                                                                                                                                                                                                  | RepA | <i>Rep_3</i><br><i>superfamily</i> | ND     |
| pFAHZU40-KPC | FAHZU40   | NZ_CP078008.1 | China:<br>Hangzhou | 28,700  | <i>aac(6')-IbΔ</i> ,<br><i>aac(6')-IbΔ</i> ,<br><i>qnrVC4</i> ,<br><i>cmlA5</i> , <i>bla</i> <sub>TEM-1C</sub> ,<br><i>bla</i> <sub>KPC-2</sub>                                                                                                                                | RepA | <i>Rep_3</i><br><i>superfamily</i> | ND     |
| pQZPH41-KPC  | QZPH41    | NZ_CP064400.1 | China:<br>Quzhou   | 88,210  | <i>bla</i> <sub>KPC-2</sub>                                                                                                                                                                                                                                                    | RepA | <i>Rep_3</i><br><i>superfamily</i> | ND     |

|        |           |               |        |         |                                                                                                                                                                                                                                                      |      |                                    |        |
|--------|-----------|---------------|--------|---------|------------------------------------------------------------------------------------------------------------------------------------------------------------------------------------------------------------------------------------------------------|------|------------------------------------|--------|
| pPUV-1 | NMI804/03 | NZ_MT732179.1 | Poland | 489,508 | <i>aadA10, aadA10,</i><br><i>aadA10, aadA10,</i><br><i>qacEΔ1, sul1,</i><br><i>bla<sub>VIM-2</sub>, bla<sub>VIM-2</sub>,</i><br><i>bla<sub>VIM-2</sub>, bla<sub>OXA-2</sub>,</i><br><i>ant(2'')-la,</i><br><i>ant(2'')-la,</i><br><i>ant(2'')-la</i> | RepA | <i>Rep_3</i><br><i>superfamily</i> | IncP-2 |
|--------|-----------|---------------|--------|---------|------------------------------------------------------------------------------------------------------------------------------------------------------------------------------------------------------------------------------------------------------|------|------------------------------------|--------|

To determine the country of isolation we relied on the information of the submitters in GenBank. Δ symbol indicates a truncated gen.

**Table S2.** Characteristics of *P. aeruginosa* plasmids with similar structure like pPE52IMP.

| Strain       | Plasmid name | Accession Number | Country       | Source              | Size (bp) | Resistance genes                                                                                                                                                                                                                      |
|--------------|--------------|------------------|---------------|---------------------|-----------|---------------------------------------------------------------------------------------------------------------------------------------------------------------------------------------------------------------------------------------|
| FDAARGOS_570 | unnamed      | CP033834.1       | USA           | Collection          | 36,032    | <i>aph(3'')-Ib</i> ,<br><i>aph(6)-Id</i> ,<br><i>aac(6')-Ib3</i> ,<br><i>aac(6')-Ib3</i> , <i>sul1</i> ,<br><i>bla<sub>VIM-6</sub></i> , <i>bla<sub>OXA-10</sub></i> ,<br><i>bla<sub>OXA-10</sub></i> , <i>qacEΔ1</i> ,<br><i>cmx</i> |
| D5170990     | pD5170990    | KX169264.1       | Brazil        | Blood               | 32,424    | <i>cmx</i> , <i>qacEΔ1</i> ,<br><i>sul1</i> , <i>bla<sub>KPC-2</sub></i> ,<br><i>aph(6)-Id</i> ,<br><i>aac(6')-II</i> ,<br><i>aph(3'')-Ib</i>                                                                                         |
| MRSN17623    | pMRVIM0713   | KP975076.1       | USA           | Unknown             | 36,032    | <i>aph(3'')-Ib</i> ,<br><i>aac(6')-Ib3</i> ,<br><i>aac(6')-Ib3</i> ,<br><i>aph(6)-Id</i> , <i>sul1</i> ,<br><i>bla<sub>VIM-6</sub></i> , <i>bla<sub>OXA-10</sub></i> ,<br><i>bla<sub>OXA-10</sub></i> , <i>qacEΔ1</i> ,<br><i>cmx</i> |
| P07-406      | pMATVIM-7    | AM778842.1       | USA:<br>Texas | Clinical<br>isolate | 24,179    | <i>bla<sub>VIM-7</sub></i>                                                                                                                                                                                                            |
| 164130       | p4130-KPC    | MN336501.1       | France        | Urine               | 58,104    | <i>aac(6')-Ib4</i> , <i>sul1</i> ,<br><i>bla<sub>KPC-2</sub></i> , <i>bla<sub>KPC-2</sub></i> ,<br><i>qacEΔ1</i> , <i>catB3</i> ,<br><i>bla<sub>OXA-732</sub></i> , <i>bla<sub>OXA-</sub></i>                                         |

**Table S3.** Characteristics of plasmids from other bacterial genera with similar structure like pPE52IMP.

| Strain | Plasmid name | Accession Number | Country   | Source                       | Size (bp) | Resistance genes                                                                                           |
|--------|--------------|------------------|-----------|------------------------------|-----------|------------------------------------------------------------------------------------------------------------|
| 138R   | p138R        | MK423762.1       | Argentina | Patient with cystic fibrosis | 34,096    | <i>aac(6')-Ib4</i> ,<br><i>qacEΔ1</i> , <i>sul1</i>                                                        |
| SM39   | pSMC1        | AP013064.1       | Japan     | Clinical isolate             | 41,517    | <i>aadA2</i> , <i>qacEΔ1</i> ,<br><i>sul1</i> , <i>bla<sub>IMP-1</sub></i> ,<br><i>bla<sub>CMY-8</sub></i> |

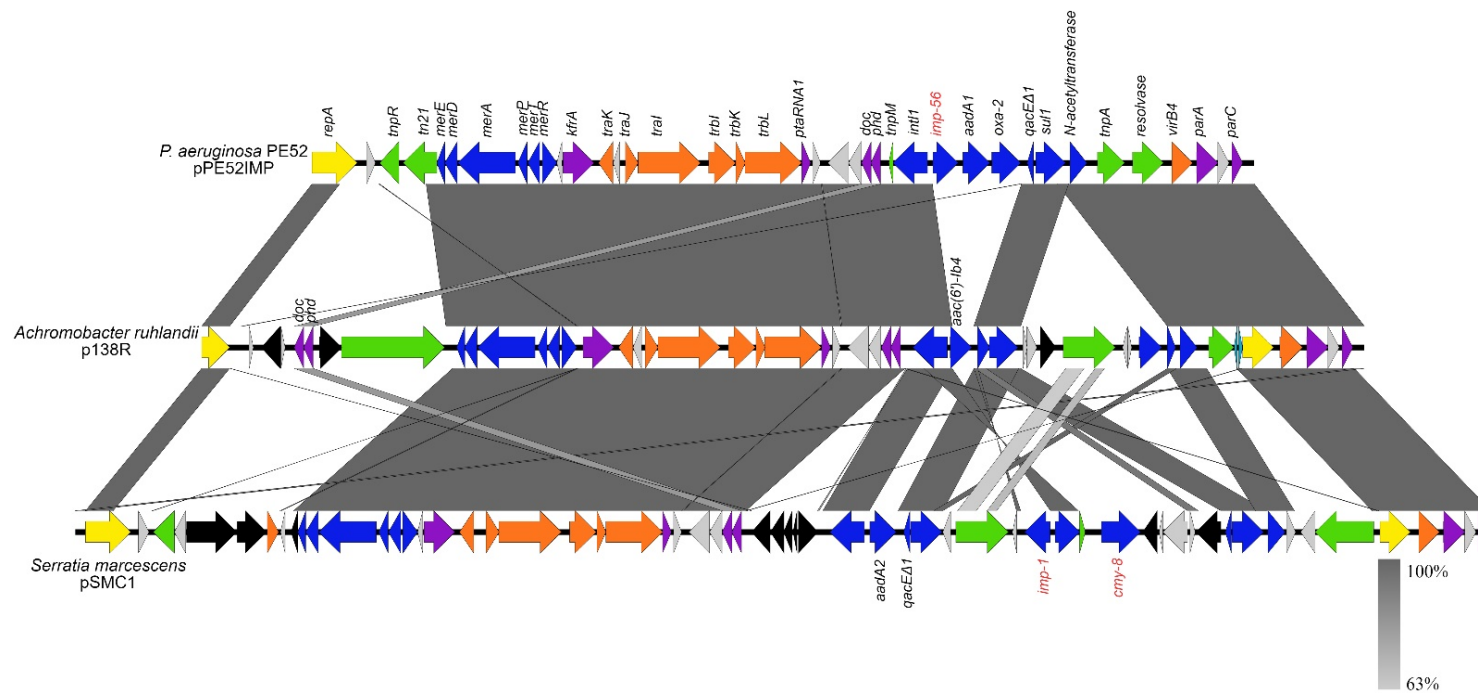

**Figure S1. Comparison of pPE52IMP with plasmids from other bacterial genera with similar backbone.** This figure was built with Easyfig [44]. Plasmid modules were represented with different colors. Yellow: replication; Purple: stability; Orange: mobilization; Blue: adaptation; Green: transposons; Grey: hypothetical proteins; Black: other genes. The gray color level indicates the percentage of BLAST identity of the plasmids. p138R (accession no. MK423762.1), pSMC1 (accession no. AP013064.1).
